# Supplementary material
Source: bioRxiv or medRxiv preprint supplement (https://www.biorxiv.org/highwire/filestream/138693/field_highwire_adjunct_files/0/462069-1.pdf)
Supplement: Supplementary file [file 462069-1.pdf]

Supplementary Table S1. Sampling sites and coordinates

| <i>Locations</i> | <i>Reef</i> | <i>Ns</i> | <i>Nt</i>  | <i>Nseq</i> | <i>Coordinates</i> |                | <i>Depth</i> |
|------------------|-------------|-----------|------------|-------------|--------------------|----------------|--------------|
| MAQNA            | R1          | 30        | 67         | 67          | 28° 31' 34.20"     | 34° 48' 14.30" | 3-5          |
|                  | R2          | 37        |            |             | 28° 25' 36.48"     | 34° 45' 06.17" | 3-7m         |
| AL-WAJH          | R1          | 59        | 113        | 113         | 26° 11' 15.05"     | 36° 20' 57.21" | 1-3m         |
|                  | R2          | 2         |            |             | 26° 09' 59.80"     | 36° 23' 32.20" | 3m           |
|                  | R3          | 24        |            |             | 26° 14' 28.3"      | 36° 26' 25.3"  | 5-10m        |
|                  | R4          | 28        |            |             | 26° 11' 06.2"      | 36° 22' 58.9"  | 3-7m         |
| YANBU            | R1          | 28        | 118        | 118         | 23° 56' 50.70"     | 38° 10' 31.80" | 6-10         |
|                  | R2          | 16        |            |             | 23° 54' 58.92"     | 38° 09' 00.63" | 6-10         |
|                  | R3          | 28        |            |             | 23° 57' 19.20"     | 38° 12' 16.00" | 3-5m         |
|                  | R4          | 29        |            |             | 23° 54' 41.4"      | 38° 09' 08.4"  | 3-7m         |
|                  | R5          | 17        |            |             | -----              | -----          | 2-10m        |
| KAUST            | R1          | 42        | 135        | 135         | 22° 19' 09"        | 38° 51' 16"    | 1-7m         |
|                  | R2          | 46        |            |             | 22° 04' 02"        | 38° 46' 09"    | 2-8m         |
|                  | R3          | 47        |            |             | 22° 30' 48"        | 38° 55' 17"    | 2-10m        |
| JEDDAH           | R1          | 30        | 70         | 64          | 21° 45' 11.40"     | 38° 57' 45.09" | 1-3m         |
|                  | R2          | 20        |            |             | 21° 46' 06.3"      | 38° 57' 47.07" | 2-5m         |
|                  | R3          | 20        |            |             | 21° 41' 23.26"     | 39° 00' 49.05" | N/A          |
| DOGA             | R1          | 29        | 88         | 88          | 19° 38' 06.40"     | 40° 34' 31.30" | 3-5m         |
|                  | R2          | 29        |            |             | 19° 36' 50.50"     | 40° 38' 17.50" | 3-5m         |
|                  | R3          | 30        |            |             | 19° 39' 56.49"     | 40° 37' 21.59" | 3-5m         |
| FARASAN          | R1          | 30        | 134        | 131         | 16° 34' 45.50"     | 42° 08' 57.50" | 4-5m         |
|                  | R2          | 30        |            |             | 16° 34' 44.38"     | 42° 14' 11.47" | 3-5m         |
|                  | R3          | 20        |            |             | 16° 31' 30.65"     | 42° 01' 57.11" | 3-4m         |
|                  | R4          | 30        |            |             | 16° 31' 38.5"      | 42° 01' 54.09" | 3-6m         |
|                  | R5          | 24        |            |             | -----              | -----          | 1-5m         |
| <b>Total</b>     |             |           | <b>725</b> | <b>716</b>  |                    |                |              |

Ns = Total number of samples per reef; Nt = Total number of samples per region; Nseq = Total number of sequences obtained for the mtORF gene

Supplementary Table S2. Primers and their respective references

| <b>Nuclear loci</b>       | Reference                 | Primer name     | sequence (5'-3')                        |
|---------------------------|---------------------------|-----------------|-----------------------------------------|
| ITS1                      | Flot et al. 2011          | F18S1           | CGATYGAAYGGTTTAGTGAGGC                  |
| ITS1                      | Flot et al. 2011          | ITScl-3         | CATTTGCGTTCAAAGATTCG                    |
| ITS2                      | LaJeunesse 2007           | ITSrev_LaJ      | GGG ATC CAT ATG CTT AAG TTC<br>AGCGGG T |
| ITS2                      | LaJeunesse 2007           | Scler5.8SbF_LaJ | GAA GAA CGC AGCCAA CTG CGA              |
| <i>hsp70</i>              | Schmidt-Roach et al. 2013 | HSP70A-F        | CCTGGTTCAATCCGACAGA                     |
| <i>hsp70</i>              | Schmidt-Roach et al. 2014 | HSP70A-R        | TGTTTCAGCTGTTTTCTTCG                    |
| <i>PMCA</i>               | Zoccola et al. 2004       | PMCA_R1         | AGGTGGCAGGATGCCACATTT                   |
| <i>PMCA</i>               | Zoccola et al. 2005       | PMCA_R2         | GGGCCACACTTCATCAAACCTT                  |
| <i>PMCA</i>               | Zoccola et al. 2006       | PMCA_R3         | ATTGCGCCCCACATAACAGC                    |
| <i>PMCA</i>               | Zoccola et al. 2007       | PMCA_F1         | TTGCTTTCAAATGTGGCATCC                   |
| <i>PMCA</i>               | Zoccola et al. 2008       | PMCA_F2         | GTAAAGCTGTTATGTGGGGG                    |
| <b>Mitochondrial loci</b> |                           |                 |                                         |
| <i>ORF</i>                | Flot et al. 2011          | FATP6.1         | TTTGGGSATTCGTTTAGCAG                    |
| <i>ORF</i>                | Flot et al. 2011          | RORF            | SCCAATATGTAAACASCATGTCA                 |
| CR                        | Flot et al. 2011          | FNAD5.2deg      | GCCYAGRGGTGTGTTCAT                      |
| CR                        | Flot et al. 2011          | RCOI3deg        | CGCAGAAAGCTCBARTCGTA                    |
| 12S                       | This study                | Ser_12s_F       | TGTCTTTGGCGAACATGGGT                    |
| 12S                       | This study                | Ser_12s_R       | AGGCCAAACGACTCCAAGTT                    |
| 12S                       | This study                | Ser_12s_IntF1   | GGGGGATTGTGCCTTTTCCT                    |
| 12S                       | This study                | Ser_12s_IntF2   | GCTTGAGTAGTACGGTCGCA                    |
| 16S                       | This study                | Sty_16s_F       | GTGCCGGGTTTATATAACCGGT                  |
| 16S                       | This study                | Sty_16s_R       | AAAGGCCAACCCTTCTCAC                     |
| 16S                       | This study                | Sty_16s_IntR_2  | AATCCCCGCTCCTCTTTCTC                    |
| 16S                       | This study                | Sty_16s_IntR_3  | GGCTGGTTCCAAGCCTACAT                    |
| <i>cox1</i>               | This study                | Sty_COXI_F      | TTTTTGGTGGAGGTGCTGGT                    |
| <i>Cox1</i>               | This study                | Sty_COXI_R      | TGACCACCACAAGCACAACCT                   |

Supplementary Table S3. Polymorphic sites per gene

| Locus                      | ALL REGIONS |           |                   |        |                             | RED SEA |           |                   |        |                             |
|----------------------------|-------------|-----------|-------------------|--------|-----------------------------|---------|-----------|-------------------|--------|-----------------------------|
|                            | Nseq        | size (bp) | Polymorphic sites | Indels | Parsimony informative sites | Nseq    | size (bp) | Polymorphic sites | Indels | Parsimony informative sites |
| <b>nDNA genes</b>          |             |           |                   |        |                             |         |           |                   |        |                             |
| ITS1                       | 75          | 416       | 69                | 94     | 54                          | 44      | 388       | 33                | 31     | 16                          |
| ITS2                       | 56          | 329       | 90                | 22     | 68                          | 42      | 300       | 44                | 3      | 26                          |
| <i>PMCA</i>                | 86          | 956       | 107               | 65     | 100                         | 50      | 953       | 26                | 11     | 18                          |
| <i>hsp70</i>               | 738         | 732       | 119               | 2      | 70                          | 646     | 732       | 91                | 2      | 33                          |
| <b>mtDNA genes</b>         |             |           |                   |        |                             |         |           |                   |        |                             |
| <i>mtORF (Clade 1 + 2)</i> | 827         | 545       | 108               | 99     | 107                         | 716     | 536       | 102               | 63     | 102                         |
| <i>mtORF (Clade 1)</i>     | 461         | 884       | 48                | 291    | 40                          | 353     | 914       | 10                | 255    | 9                           |
| <i>mtORF (Clade 2)</i>     | 366         | 943       | 22                | 207    | 21                          | 361     | 943       | 22                | 207    | 21                          |
| CR                         | 401         | 757       | 68                | 461    | 65                          | 325     | 620       | 3                 | 146    | 3                           |
| 12S                        | 72          | 1381      | 33                | 0      | 33                          | 50      | 1381      | 6                 | 0      | 5                           |
| 16S                        | 61          | 1393      | 7                 | 0      | 7                           | 43      | 1393      | 1                 | 0      | 1                           |
| <i>cox1</i>                | 147         | 538       | 19                | 0      | 12                          | 110     | 538       | 0                 | 0      | 0                           |
